1 **Prevalence of coronary artery disease among COVID-19 patients: a systematic review and meta-**  
2 **analysis**

3

4 Naushaba Akhtar<sup>1</sup>, Bijaya Kumar Padhi<sup>2</sup>, Muhammad Aaqib Shamim<sup>3</sup>, Nandhni Chiruganam  
5 Gandhi<sup>4</sup>, Prakisini Satapathy<sup>5</sup>, Sanghamitra Pati<sup>1\*</sup>, Behdin Nowrouzi-Kia<sup>6</sup>, Vijay Kumar  
6 Chattu<sup>6,7,8,\*</sup>

7 <sup>1</sup> Indian Council of Medical Research – Regional Medical Research Centre, Chandrasekharpur,  
8 Bhubaneswar, India. Email: [nakhtar118@gmail.com](mailto:nakhtar118@gmail.com)

9 <sup>2</sup> Department of Community Medicine and School of Public Health, Postgraduate Institute of  
10 Medical Education and Research, Chandigarh, 160012 India.

11 <sup>3</sup> Department of Pharmacology, All India Institute of Medical Sciences, Jodhpur, India.

12 <sup>4</sup> School of Dentistry, University of Dundee, Scotland, UK.

13 <sup>5</sup> Department of Virology, Postgraduate Institute of Medical Education and Research,  
14 Chandigarh, 160012 India.

15 <sup>6</sup> ReSTORE Lab, Department of Occupational Science & Occupational Therapy, Temerty  
16 Faculty of Medicine, University of Toronto, Toronto, ON M5G 1V7, Canada

17 <sup>7</sup> Center for Transdisciplinary Research, Saveetha Dental College, Saveetha Institute of  
18 Medical and Technological Sciences, Saveetha University, Chennai 602105, India

19 <sup>8</sup> Department of Community Medicine, Faculty of Medicine, Datta Meghe Institute of  
20 Medical Sciences, Wardha 442107, India

21

22 **Withdrawal statement**

- 23 The authors have withdrawn their manuscript owing to a complete change in methods and  
24 results. Therefore, the authors do not wish this work to be cited as reference for the project.  
25 If you have any questions, please contact the first author.
